# Supplementary material
Source: Frontiers journal article supplement (https://www.frontiersin.org/articles/559050)
Supplement: Image_3.PDF [file Image_3.PDF]

*Saccharomyces cerevisiae* LEU9 MYKHSFIALAEHA-SKLRSIPPVYKLTYNHLRDPVVKYRAF-APPKHYKRIHPDKTIQAPRWLSTDL  
*Saccharomyces cerevisiae* LEU4 MYKESIALAEHAASRASRVIPPVYKLAYKNHLKDPSSKYKPF-NAPKLSNRKWPONRITRAPRWLSTDL  
*Kluyveromyces lactis* LEU4 MIFRNTVYRLAQAG----KKAIPPVYKLAYKNHLKDPSTKYRPF-PQINLENRQWPSKTIITKAPRWLSTDL  
*Nakazawaea wickerhamii* II MFKRTVYNLAKYG-----KSFEPTYKSNHLKDPSSKYIPY-PGVNMASTRDPSSKITKAPRWLSTDL  
*Peterozyma xilosa* II MFKKSGIVFSKAA-----KSFEPTFKNHLRDPSSKYKAY-PGVQMESRDWPSSKITKAPRWLSTDL  
*Pachysolen tannophilus* II MFKKTYYAFQKSAILK-----EGVVTAYKNLLKDPSSLKYKSS-PKINLSNRQWPSKTIERRAPRWLSTDL  
*Kluyveromyces lactis* LEU4Bis MPFYKDPSSVYKYPFVSNVYKLQDRKWPSSKTLNKAAPRWLSTDL  
*Nakazawaea wickerhamii* I MYNHLKDPSSVYKNKF-QPTNLPNRQWPNKTLDPKPRWLSTDL  
*Peterozyma xilosa* I MYNHLKETSLKYTKF-QPLDLPNRQWPSKSIDKPPRWLSTDL  
*Pachysolen tannophilus* I MGNHLKDPSSVYKYPF-TPIDLPNREWPSSKTLDPKPRWLSTDL

**Supplementary Figure S3.** Amino-terminus of  $\alpha$ -IPMS proteins from representative species. The sequences shown were extracted from a MultAlin alignment (<http://multalin.toulouse.inra.fr/multalin/>) (Corpet, 1988). The red arrow indicates the highly conserved, alternative initiation methionine of the ScLeu4 protein, which leads to a cytosolic localized isoform (Beltzer et al., 1986; Beltzer et al., 1988). Species in red correspond to species of the CUG-Ala Clade (Shen et al., 2018), the presumed root of the  $\alpha$ -IPMS gene duplication in the Saccharomycotina (see **Supplementary Data, Supplementary Figure S2** and text). Analysis of these sequences with DeepLoc-1.0 scored the proteins of the CUG-Ala Clade labelled I as cytosolic, and those labelled as II as mitochondrial. The coloring of residues is automatically set by the program and follows the standard Multalin default convention: residues in red, high consensus value; residues in blue, low consensus value; residues in black, no consensus at that position.
